# Supplementary material for: Cu(ii)@Luviset clear as recyclable catalyst for the formation of C–C bond in homo-coupling of terminal alkynes
Source: Royal Society of Chemistry journal article supplement (doi:10.1039/c5ra17834g), 2015-01-01
Supplement: c5ra17834g1.pdf [file c5ra17834g1.pdf]

## Supporting Information

# **Cu(II)@luviset clear as recyclable catalyst for the formation of C-C bond in homo-coupling of terminal alkynes**

Zheng-Jun Wang,<sup>a</sup> Peng-Hui Wang,<sup>a</sup> Jing-Jing Lv,<sup>b</sup> Jiu-Ju Feng,<sup>b</sup> Xinhua Xu,<sup>a\*</sup> Ai-Jun Wang,<sup>b\*</sup>

Chak-Tong Au,<sup>a</sup> Renhua Qiu<sup>a\*</sup>

<sup>a</sup> *State Key Laboratory of Chemo/Biosensing and Chemometrics, College of Chemistry and Chemical Engineering, Hunan University, Changsha 410000, China*

<sup>b</sup> *College of Geography and Environmental Science, College of Chemistry and Life Science, Zhejiang Normal University, Jinhua 321004, China*

*\*Corresponding Author: Tel./Fax: +86 731 8882-1546, e-mail: renhuaqiu@hnu.edu.cn or*

*xhx1581@hnu.edu.cn; Tel./Fax: +86 579 82282269, e-mail: ajwang@zjnu.cn (AJW)*

## **List of contents:**

General protocol for homo-coupling reactions of terminal alkynes

References

$^1\text{H}$  NMR,  $^{13}\text{C}$  NMR spectra of all compounds

**General protocol for homo-coupling reactions of terminal alkynes:** A mixture of terminal alkyne (1 mmol),  $\text{Cu}(\text{NO}_3)_2$  (4 mmol %, 7.5 mg), **L1** (128 mg), and DMSO (2 mL) were put into a sealed Schlenk tube (10 mL), and then the mixture was stirred for desired time at 100 °C. The reaction was monitored by thin layer chromatography (TLC). Afterward, the reaction mixture was cooled to room temperature. The combined organic layer was dried by anhydrous sodium sulfate, and the crude product was purified by column chromatography on silica gel. NMR spectra were recorded in  $\text{CDCl}_3$  on a Varian Inova-400 MHz NMR spectrometer with TMS as internal reference. Products were characterized by comparing  $^1\text{H}$  NMR and  $^{13}\text{C}$  NMR data with those in the literature.

**$^1\text{H}$  NMR,  $^{13}\text{C}$  NMR, and mass spectral data of the products from homo-coupling reactions:** From 2a-2k are those of known compounds.<sup>1-6</sup> The results of isolated products are summarized as follows:

**1,4-Diphenyl buta-1,3-diyne (2a):** White solid;  $^1\text{H}$  NMR (400 MHz,  $\text{CDCl}_3$ ):  $\delta$  (ppm) 7.36 (t, 6H,  $J = 7.8$  Hz), 7.53 (d, 4H,  $J = 7.6$  Hz);  $^{13}\text{C}$  NMR (100 MHz,  $\text{CDCl}_3$ ):  $\delta$  (ppm) 73.91, 81.56, 121.79, 128.47, 129.24, 132.53. MS (EI):  $m/z$  202.1.

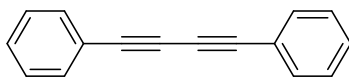

**2a**

**1,4-Bis(p-methylphenyl)buta-1,3-diyne (2b):** White solid;  $^1\text{H}$  NMR (400MHz,  $\text{CDCl}_3$ ):  $\delta$  (ppm) 2.36 (s, 6H), 7.14 (d, 4H,  $J = 8.0$  Hz), 7.41 (d, 4H,  $J = 8.0$  Hz);  $^{13}\text{C}$  NMR (100 MHz,  $\text{CDCl}_3$ ):  $\delta$  (ppm) 29.66, 73.41, 81.49, 118.78, 129.15, 132.24, 139.43. MS (EI):  $m/z$  230.1.

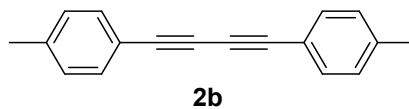

**1,4-Bis(m-methylphenyl)buta-1,3-diyne (2c):** White solid;  $^1\text{H}$  NMR (400 MHz,  $\text{CDCl}_3$ ):  $\delta$  (ppm) 2.34 (s, 6H), 7.17-7.24 (m, 4H), 7.34 (d, 3H,  $J = 8.4$  Hz);  $^{13}\text{C}$  NMR (100 MHz,  $\text{CDCl}_3$ ):  $\delta$  (ppm) 29.66, 73.61, 81.57, 121.62, 128.27, 129.56, 130.05, 132.93, 138.11. MS (EI):  $m/z$  230.1.

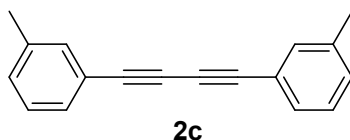

**1,4-Bis(o-methylphenyl)buta-1,3-diyne (2d):** White solid,  $^1\text{H}$  NMR (400 MHz,  $\text{CDCl}_3$ ):  $\delta$  (ppm) 2.42 (s, 6H), 7.07-7.10 (m, 2H), 7.14-7.19 (m, 4H), 7.43 (d, 2H,  $J = 7.6$  Hz);  $^{13}\text{C}$  NMR (100 MHz,  $\text{CDCl}_3$ ):  $\delta$  (ppm) 19.72, 76.49, 80.11, 120.71, 124.64, 128.08, 128.55, 131.90, 140.63. MS (EI):  $m/z$  230.1.

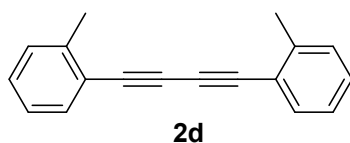

**1,4-Bis(p-methoxyphenyl)buta-1,3-diyne (2e):** White solid;  $^1\text{H}$  NMR (400 MHz,  $\text{CDCl}_3$ ):  $\delta$  (ppm) 3.80 (d, 6H,  $J = 7.2$  Hz), 6.86 (t, 4H,  $J = 7.6$  Hz), 7.46 (t, 4H,  $J = 8.0$  Hz);  $^{13}\text{C}$  NMR (100 MHz,  $\text{CDCl}_3$ ):  $\delta$  (ppm) 55.33, 72.90, 81.22, 114.11, 134.02, 160.21. MS (EI):  $m/z$  262.1.

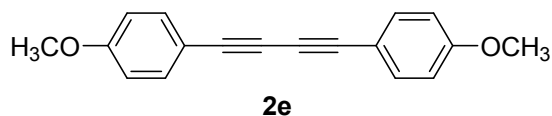

**1,4-Bis(m-aminophenyl)buta-1,3-diyne (2f)**: Yellow liquid;  $^1\text{H}$  NMR (400 MHz,  $\text{CDCl}_3$ ):  $\delta$  (ppm), 3.70 (s, 4H), 6.67-6.69 (m, 2H), 6.82 (t, 2H,  $J=1.6$  Hz), 6.92-6.94 (m, 2H), 7.09-7.13 (m, 2H);  $^{13}\text{C}$  NMR (100 MHz,  $\text{CDCl}_3$ ):  $\delta$  (ppm) 73.34, 81.60, 116.20, 122.46, 122.92, 129.32, 146.25. MS (EI):  $m/z$  232.1.

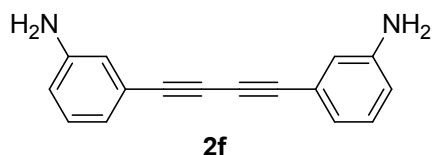

**1,4-Bis(4-tert-butylphenyl)buta-1,3-diyne (2g)**: White solid;  $^1\text{H}$  NMR (400 MHz,  $\text{CDCl}_3$ ):  $\delta$  (ppm) 1.32 (s, 18H), 7.35 (d, 4H, 8.0 Hz), 7.46 (d, 4H,  $J=8.4$  Hz);  $^{13}\text{C}$  NMR (100 MHz,  $\text{CDCl}_3$ ): 31.11, 34.92, 73.46, 81.51, 118.83, 125.48, 132.26, 152.58. MS (EI):  $m/z$  314.2.

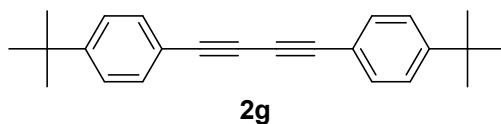

**1,4-Bis(4-propylphenyl)buta-1,3-diyne (2h)**: Pale yellow solid;  $^1\text{H}$  NMR (400 MHz,  $\text{CDCl}_3$ ):  $\delta$  (ppm) 0.94 (t, 6H,  $J=7.4$  Hz), 1.61-1.66 (m, 4H), 2.59 (t, 4H,  $J=7.6$  Hz), 7.14 (d, 4H,  $J=8.0$  Hz), 7.44 (d, 4H,  $J=8.0$  Hz);  $^{13}\text{C}$  NMR (100 MHz,  $\text{CDCl}_3$ ):  $\delta$  (ppm) 13.76, 24.27, 38.05, 73.46, 81.58, 119.04, 128.63, 132.48, 144.24. MS (EI):  $m/z$  286.1.

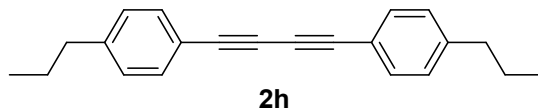

**1,4-Bis(4-fluorophenyl)buta-1,3-diyne (2i):** White solid;  $^1\text{H}$  NMR (400 MHz,  $\text{CDCl}_3$ ):  $\delta$  (ppm) 7.04 (t, 4H,  $J = 8.6$  Hz), 7.49-7.53 (m, 4H);  $^{13}\text{C}$  NMR (100 MHz,  $\text{CDCl}_3$ ):  $\delta$  (ppm) 73.54, 80.44, 115.81, 116.03, 117.81, 117.85, 134.50, 134.59, 161.82, 164.32. MS (EI):  $m/z$  238.1.

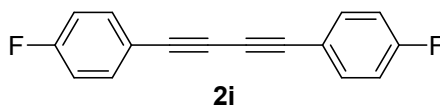

**1,4-Bis(4-(trifluoromethyl)phenyl)buta-1,3-diyne (2j):** White solid;  $^1\text{H}$  NMR (400 MHz,  $\text{CDCl}_3$ ):  $\delta$  (ppm) 7.60-7.66 (m, 8H);  $^{13}\text{C}$  NMR (100 MHz,  $\text{CDCl}_3$ ):  $\delta$  (ppm) 75.63, 80.97, 125.26, 125.45, 125.49, 130.95, 131.27, 132.82. MS (EI):  $m/z$  338.1.

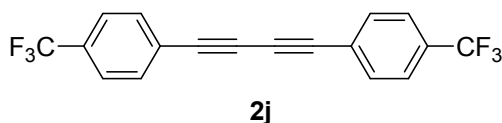

**1,6-Diphenoxy-2,4-hexadiyne (2k):** White solid;  $^1\text{H}$  NMR (400 MHz,  $\text{CDCl}_3$ ):  $\delta$  (ppm) 4.75 (s, 4H), 6.89-6.96 (m, 4H), 6.99-7.02 (m, 2H), 7.25-7.32 (m, 4H);  $^{13}\text{C}$  NMR (100 MHz,  $\text{CDCl}_3$ ):  $\delta$  (ppm) 56.05, 70.92, 74.54, 114.75, 121.66, 129.45, 157.27. MS (EI):  $m/z$  262.1.

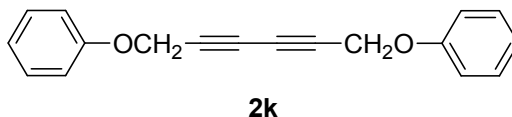

**1,4-Bis(3-pyridyl)buta-1,3-diyne (2l):** White solid;  $^1\text{H}$  NMR (400 MHz,  $\text{CDCl}_3$ ):  $\delta$  (ppm) 7.29-7.32 (m, 2H), 7.82 (d, 2H,  $J = 8.0$  Hz), 8.60-8.61 (d, 2H,  $J = 3.6$  Hz), 8.77-

8.78 (d, 2H, J = 1.2 Hz);  $^{13}\text{C}$  NMR (100 MHz,  $\text{CDCl}_3$ ):  $\delta$  (ppm) 76.62, 79.17, 118.87, 123.11, 139.41, 149.52, 153.17. MS (EI): m/z 204.1.

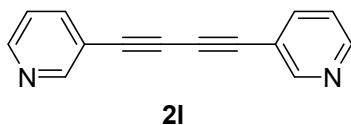

**1,4-Dithienyl buta-1,3-diyne (2m):** White solid;  $^1\text{H}$  NMR (400 MHz,  $\text{CDCl}_3$ ):  $\delta$  (ppm) 7.17 (d, 2H, J = 4.8 Hz) 7.27-7.29 (m, 2H), 7.58 (d, 2H, J = 2.8 Hz);  $^{13}\text{C}$  NMR (100 MHz,  $\text{CDCl}_3$ ):  $\delta$  (ppm) 73.51, 76.56, 120.91, 125.61, 130.18, 131.24. MS (EI): m/z 213.1.

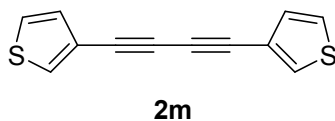

## References

- (1) X. Meng, C. Li, B. Han, T. Wang and B. Chen, *Tetrahedron*. 2010, **66**, 4029-4031.
- (2) F. Alonso, T. Melkonian, Y. Moglie and M. Yus, *Eur. J. Org. Chem.* 2011, **2011**, 2524-2530.
- (3) D. Wang, J. Li, N. Li, T. Gao, S. Hou and B. Chen, *Green Chem.* 2010, **12**, 45-48.
- (4) W. Zhang, W. Xu, F. Zhang, H. Jin, Y. Wang and J. Li, *Res. Chem. Intermed.* 2014, **40**, 1337-1344.
- (5) T. Oishi, K. Yamaguchi and N. Mizuno, *ACS Catal.* 2011, **1**, 1351-1354.
- (6) K. Yin, C. J. Li, J. Li and X. S. Jia, *Appl. Organomet. Chem.* 2011, **25**, 16-20.

# $^1\text{H}$ NMR, $^{13}\text{C}$ NMR spectra of all compounds

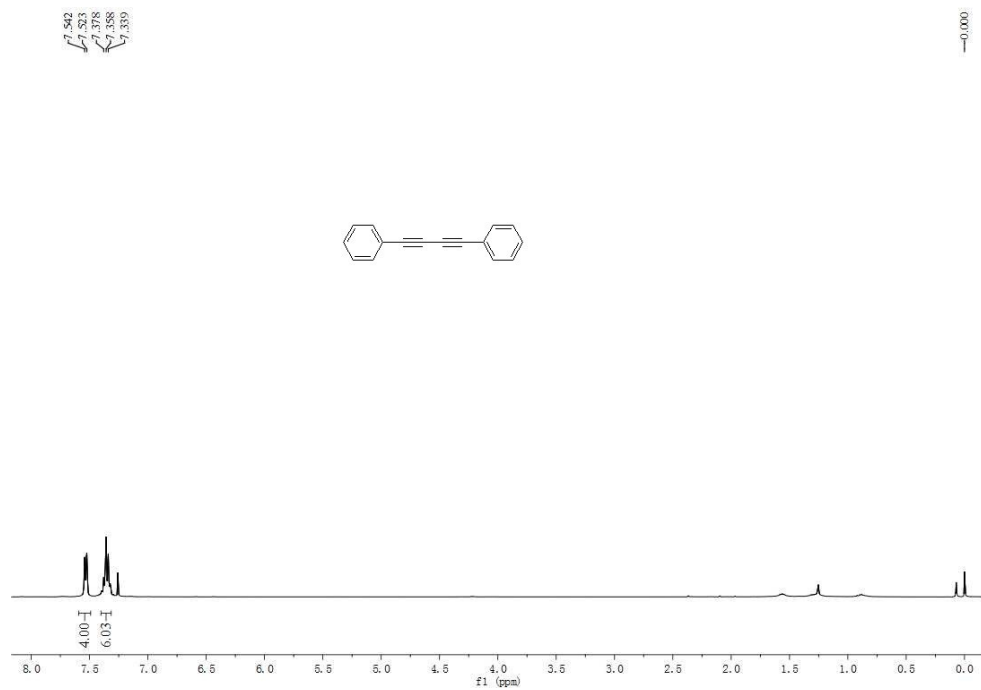

## $^1\text{H}$ NMR of 2a

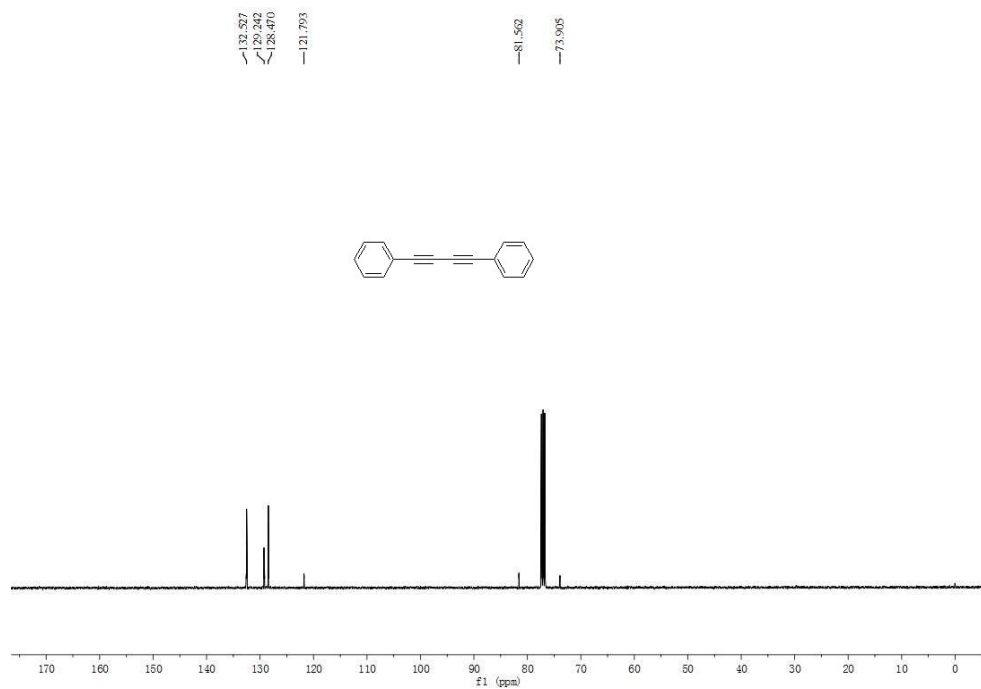



### $^{13}\text{C}$ NMR of **2a**

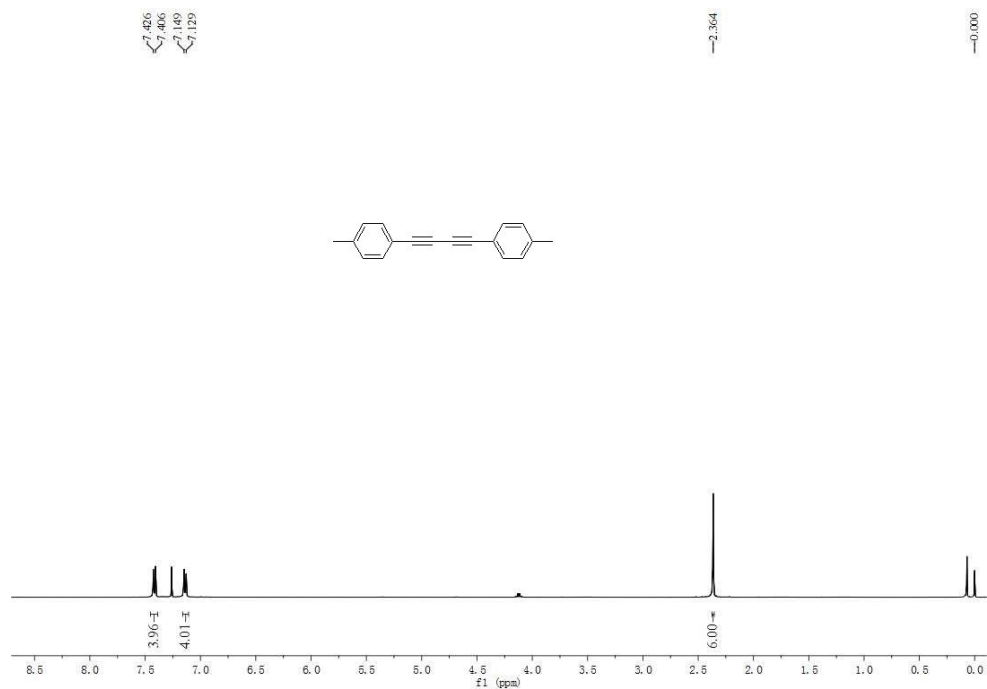

### $^1\text{H}$ NMR of **2b**

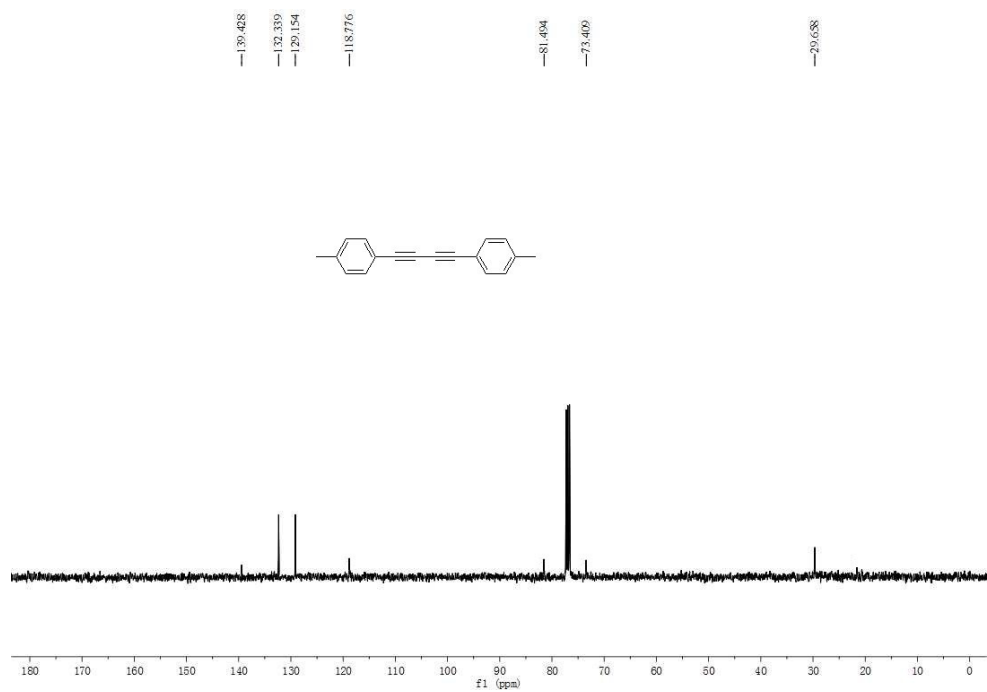

### $^{13}\text{C}$ NMR of **2b**

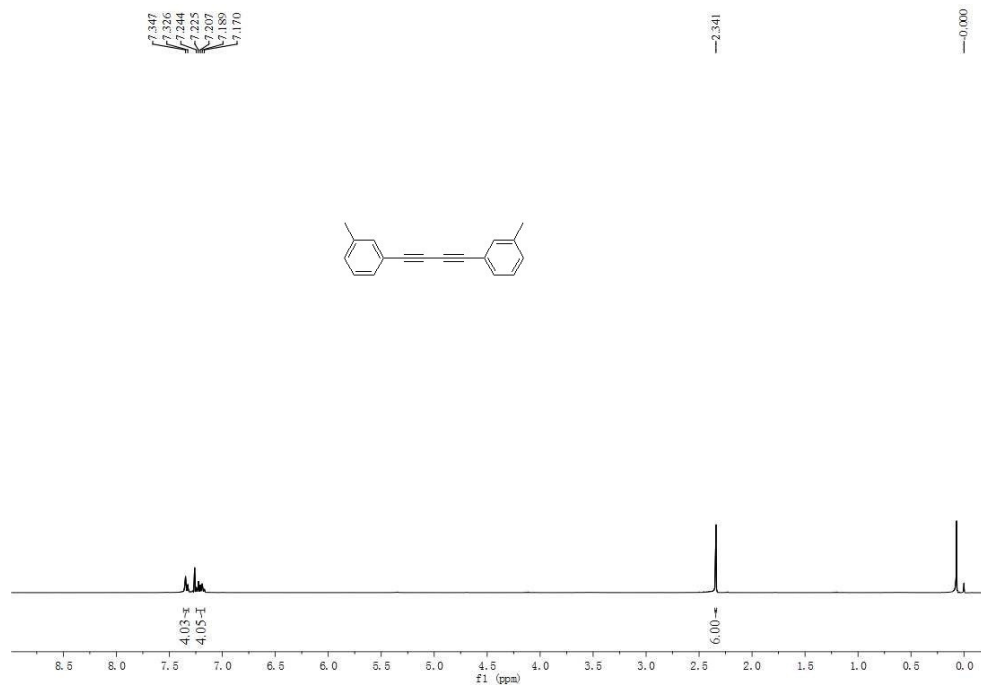

<sup>1</sup>H NMR of 2c

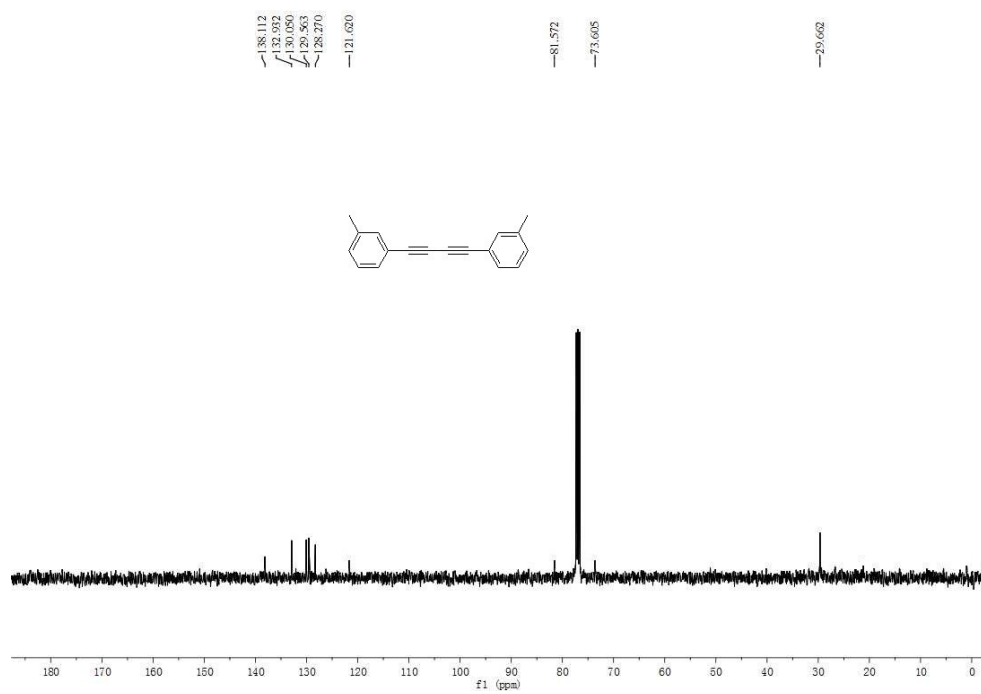

### $^{13}\text{C}$ NMR of **2c**

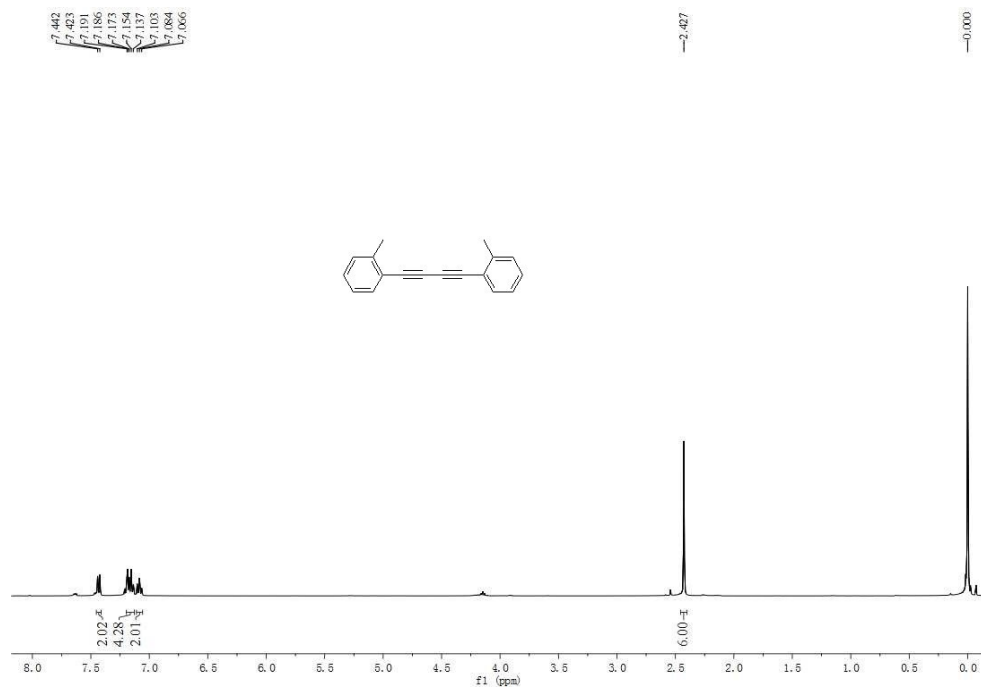

### $^1\text{H}$ NMR of **2d**

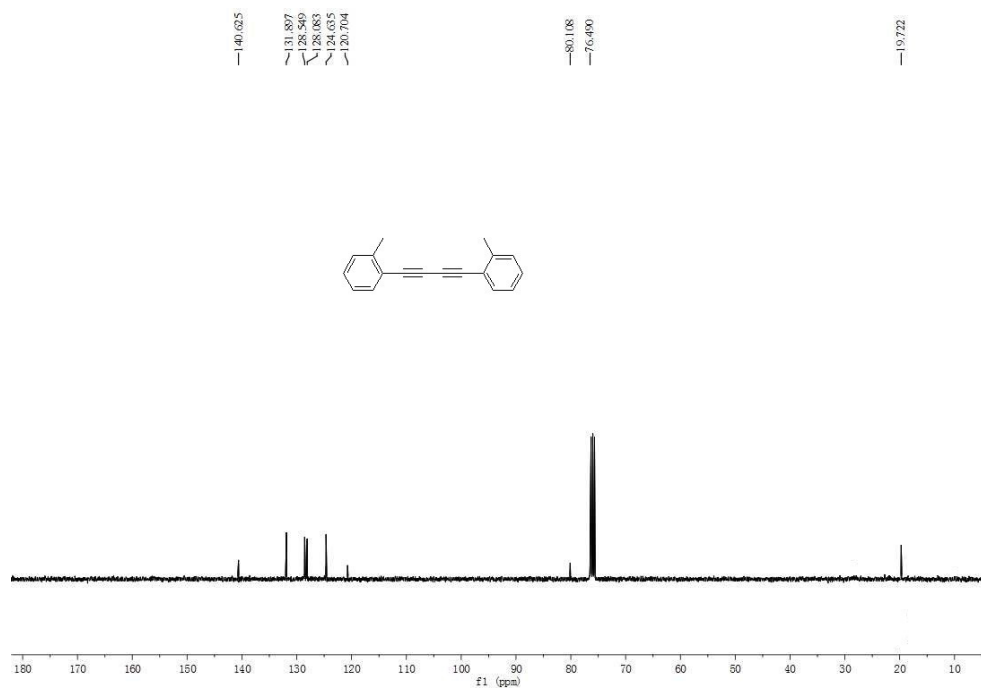

### $^{13}\text{C}$ NMR of **2d**

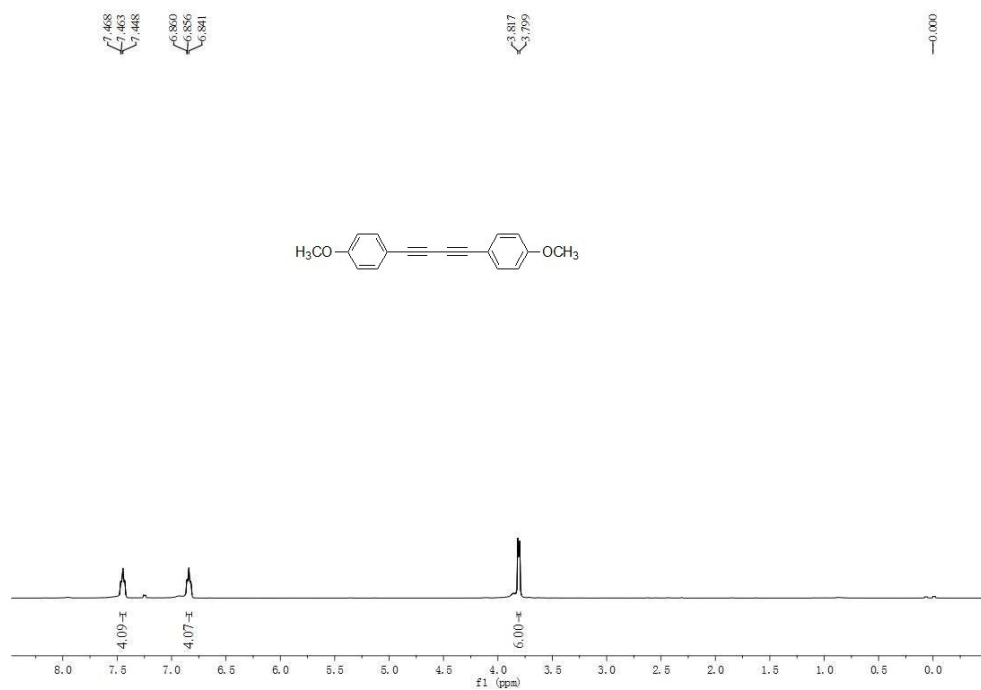

$^1\text{H}$  NMR of **2e**

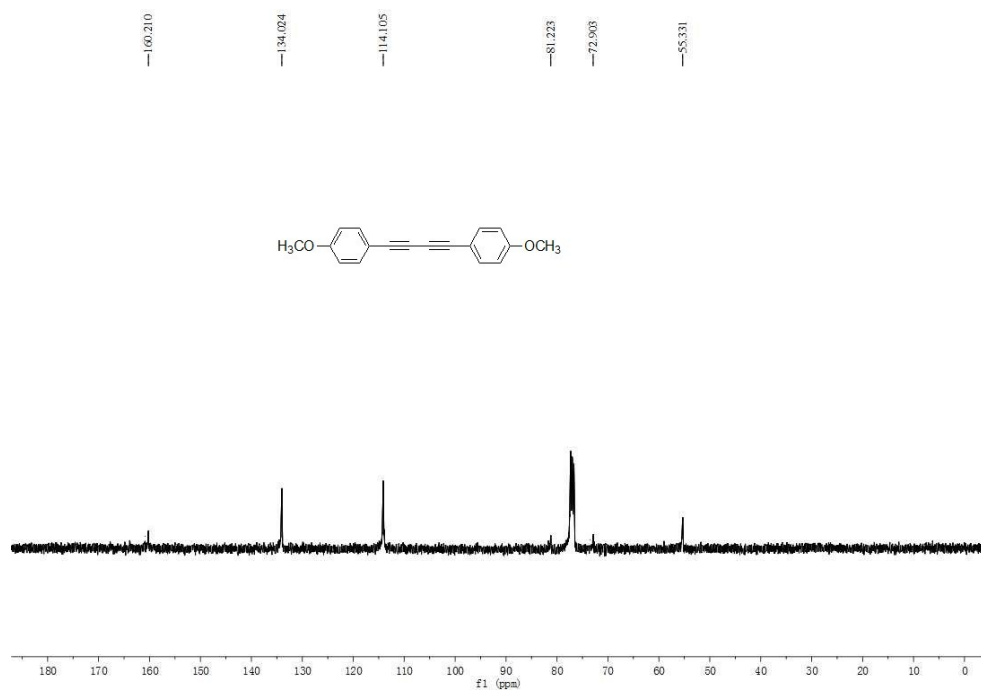

$^{13}\text{C}$  NMR of **2e** in

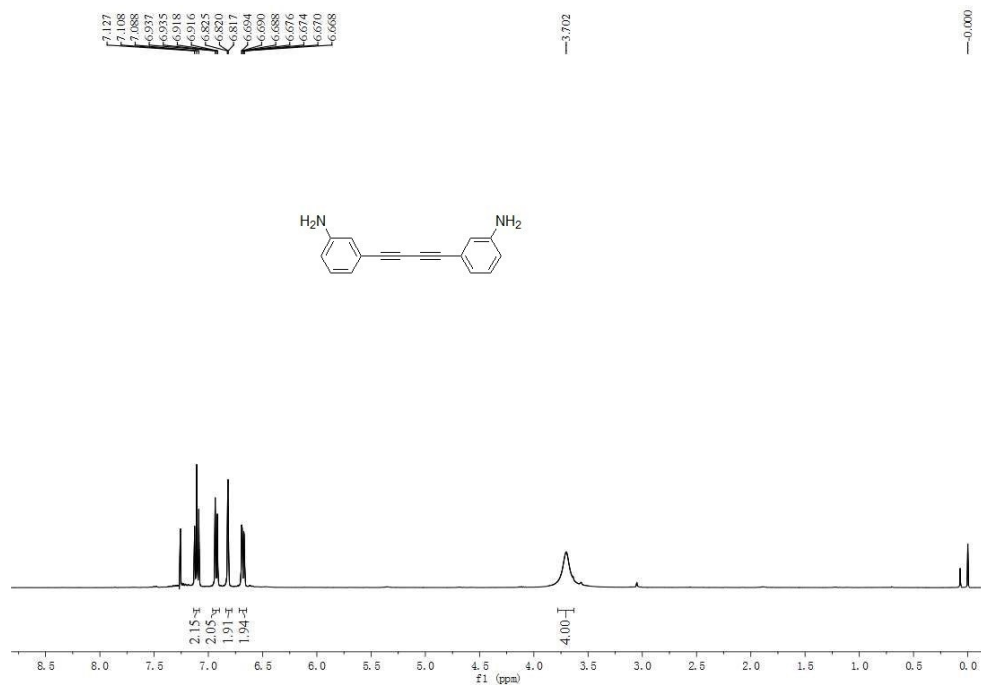

<sup>1</sup>H NMR of **2f**

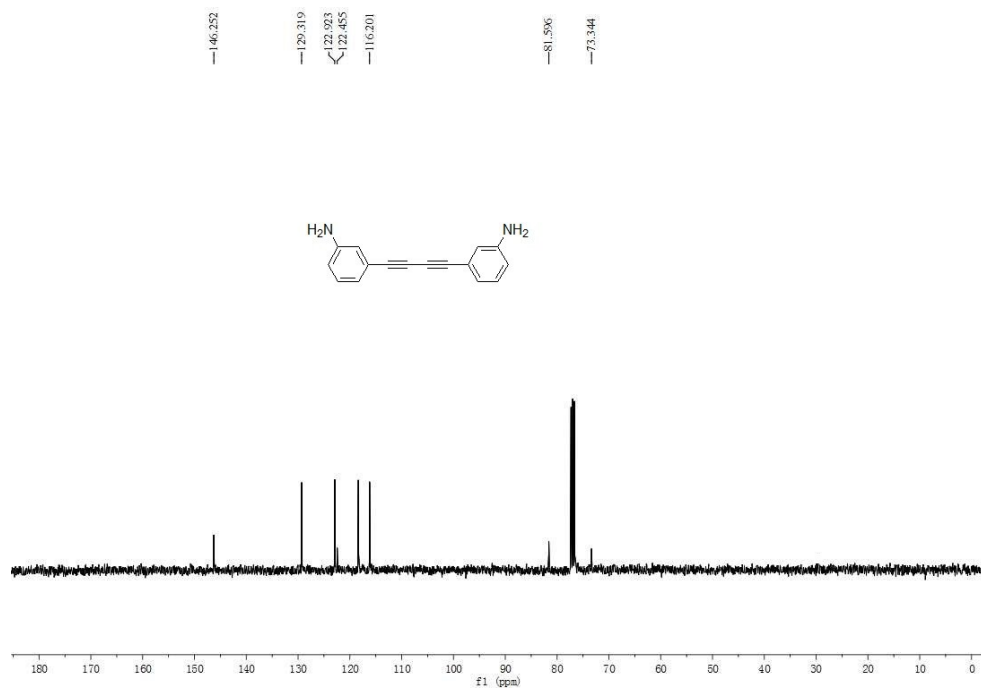

<sup>13</sup>C NMR of **2f**

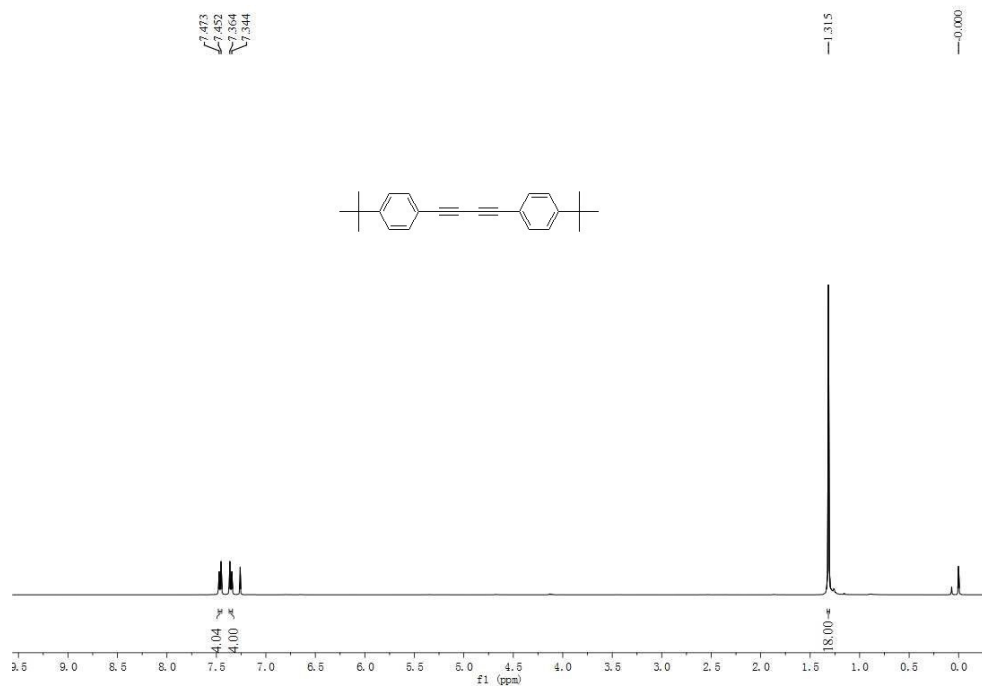

$^1\text{H}$  NMR of **2g**

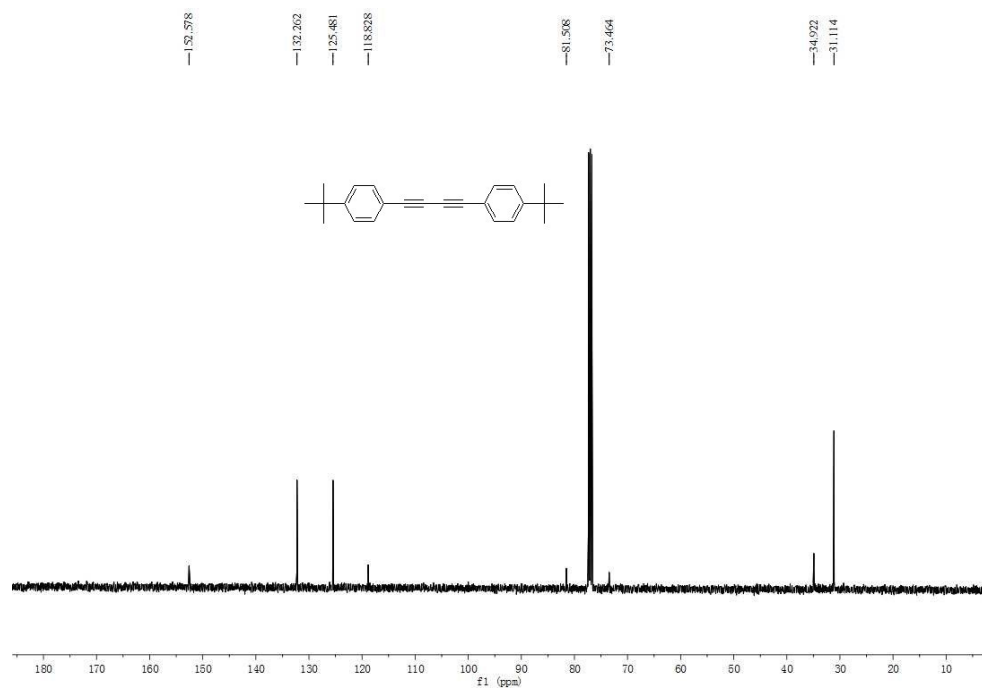

$^{13}\text{C}$  NMR of **2g**

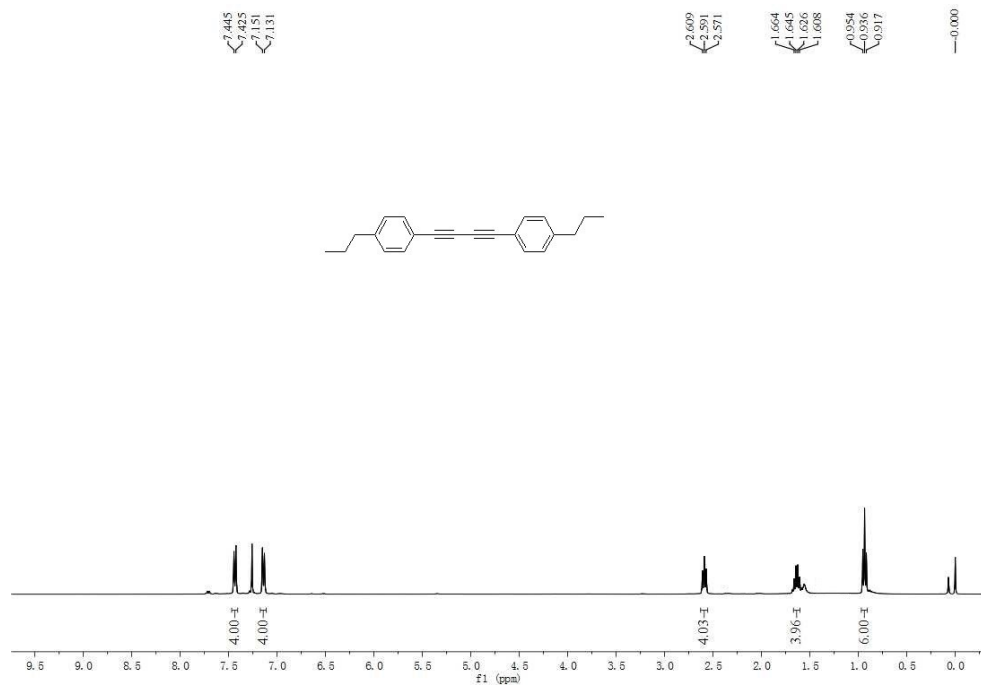

<sup>1</sup>H NMR of 2h

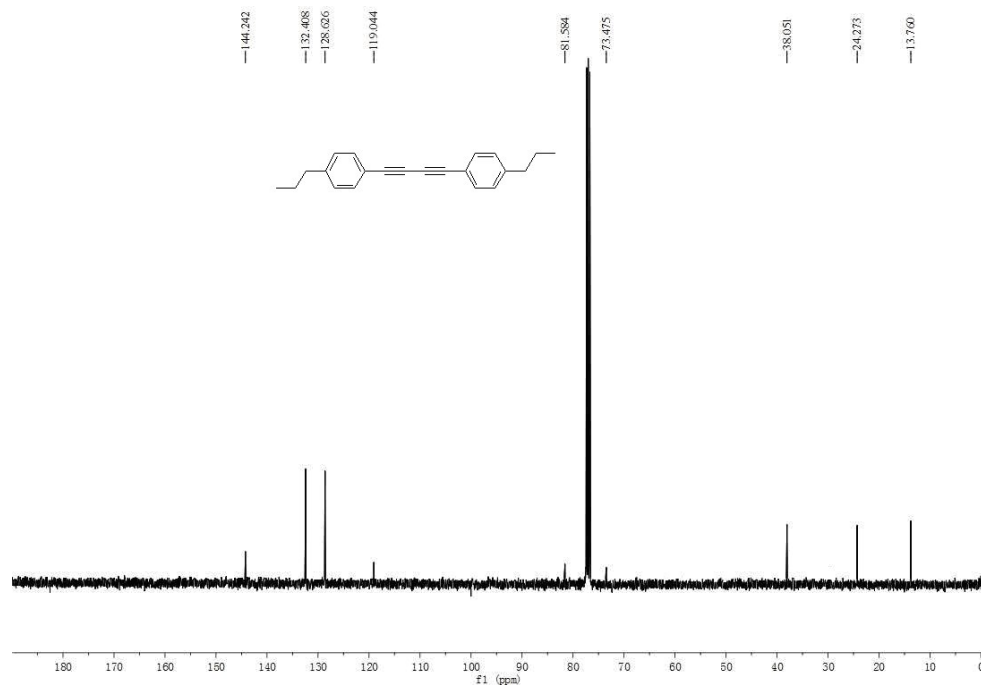

<sup>13</sup>C NMR of 2h

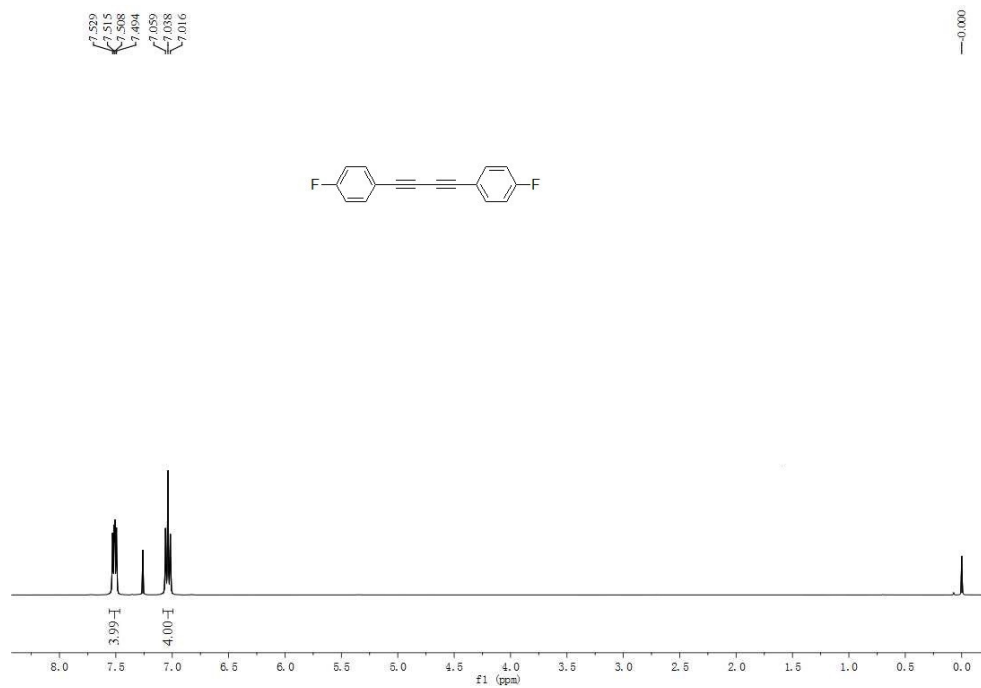

<sup>1</sup>H NMR of **2i**

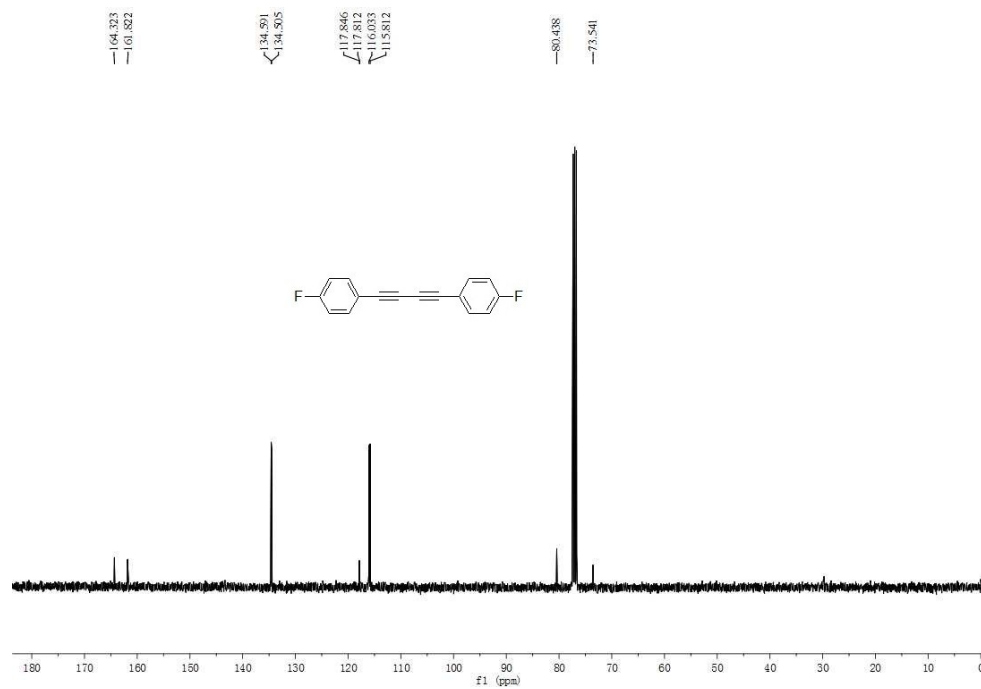

<sup>13</sup>C NMR of **2i**



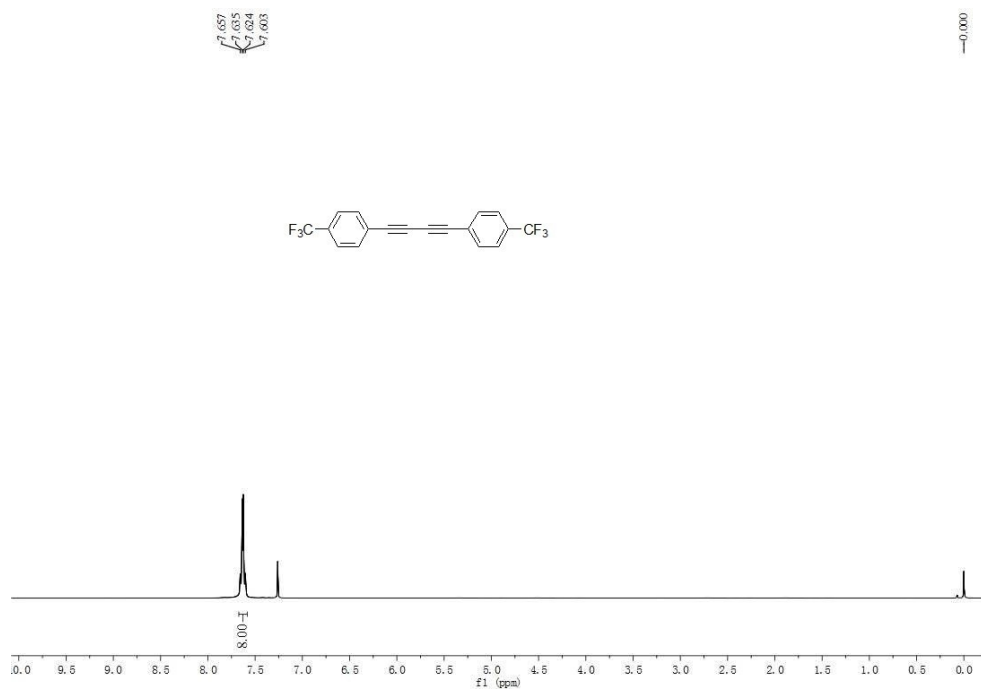

$^1\text{H}$  NMR of **2j**

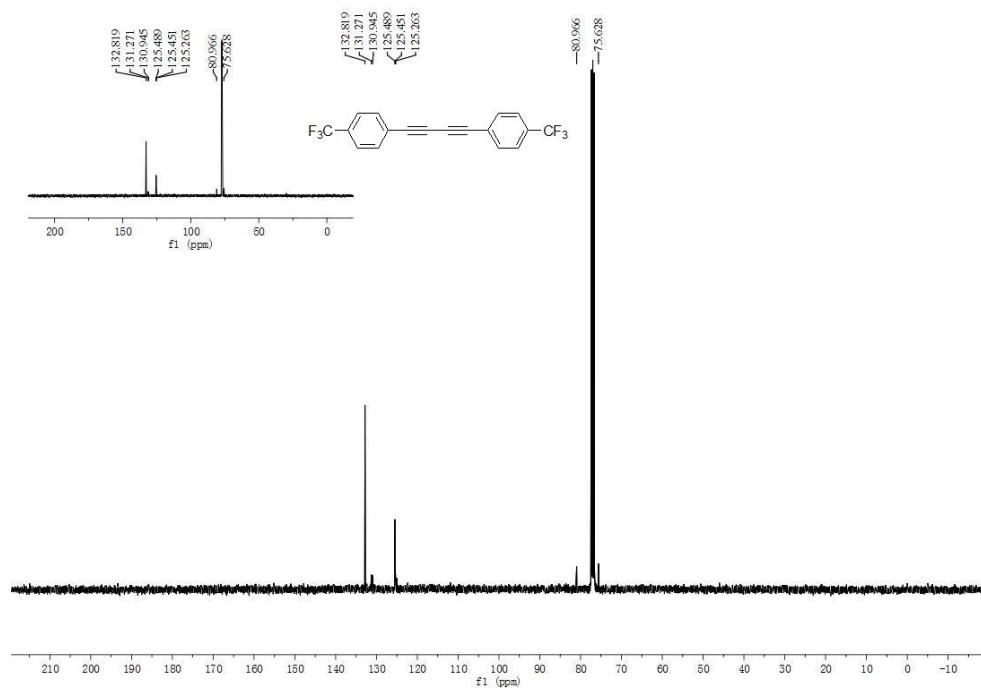

$^{13}\text{C}$  NMR of **2j**

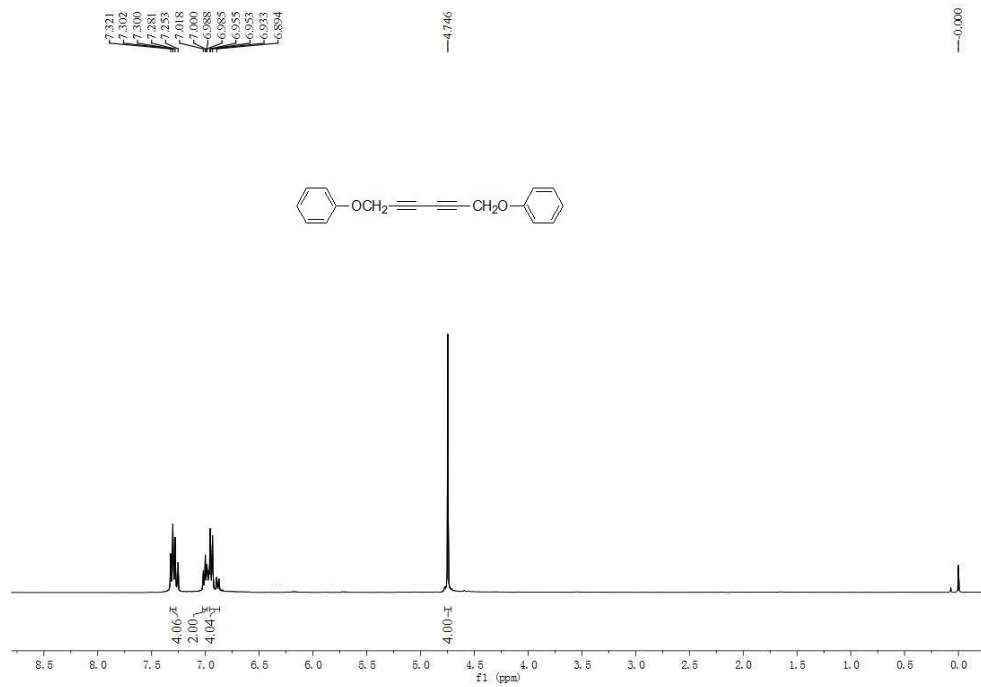

<sup>1</sup>H NMR of **2k**

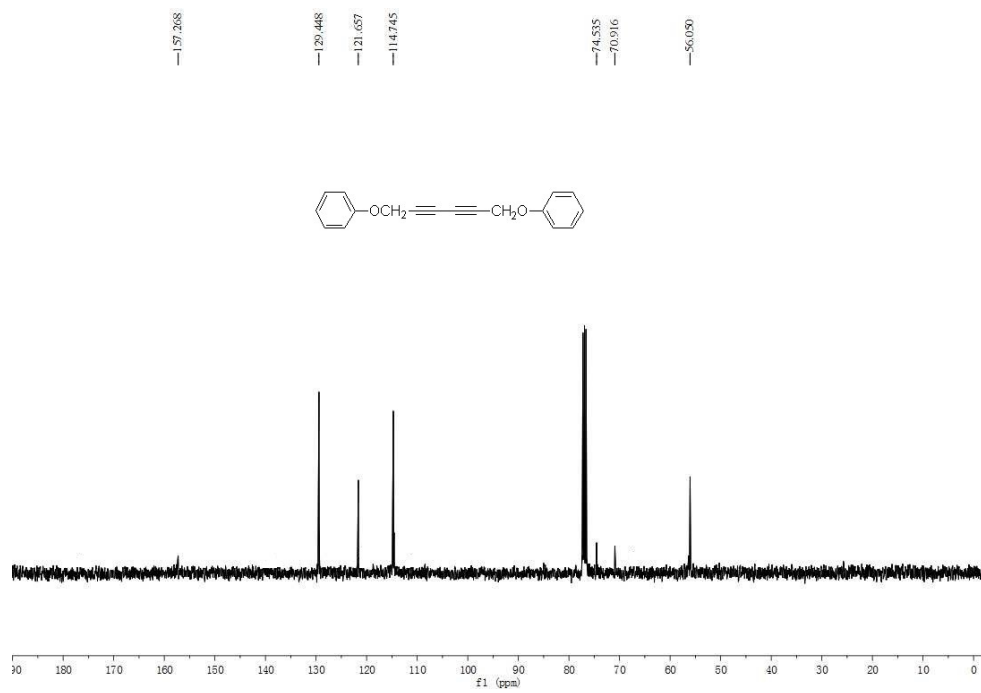

<sup>13</sup>C NMR of **2k**

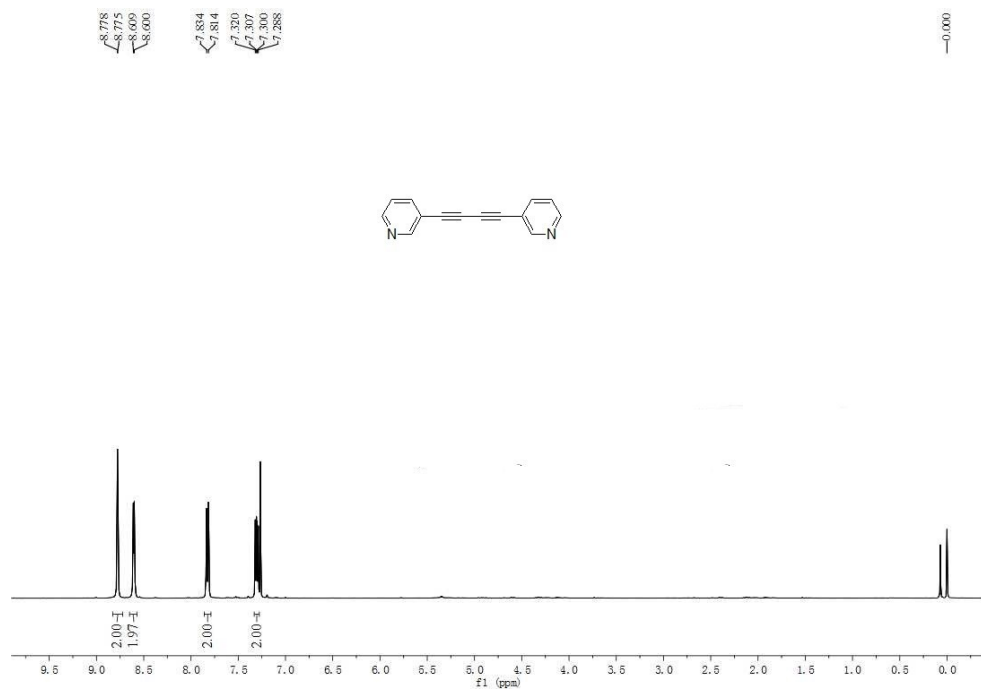

$^1\text{H}$  NMR of **2I**

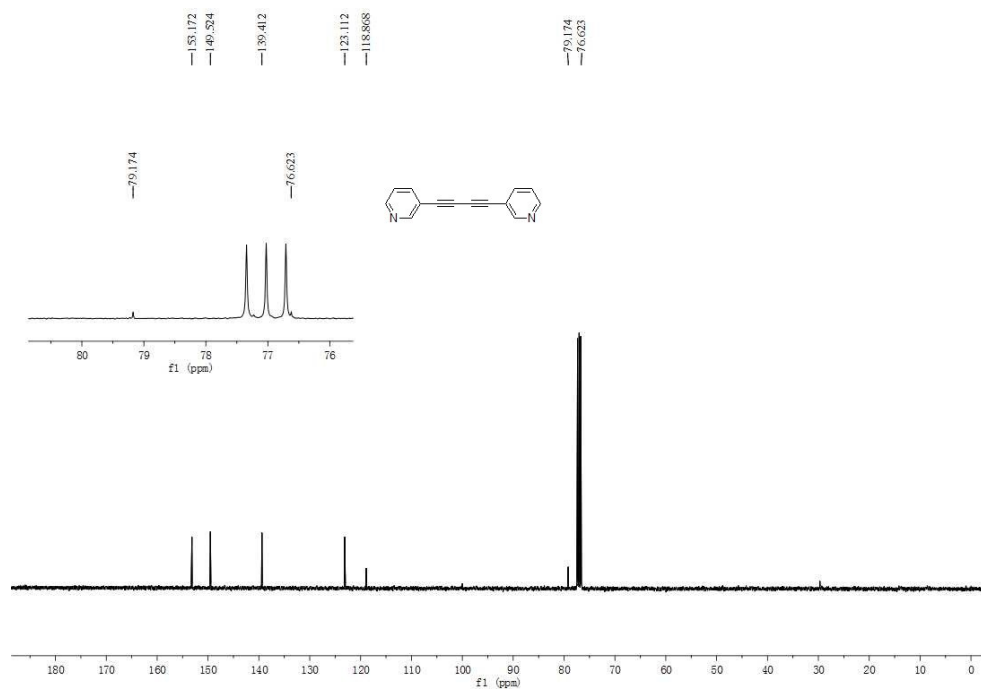

$^{13}\text{C}$  NMR of **2I**

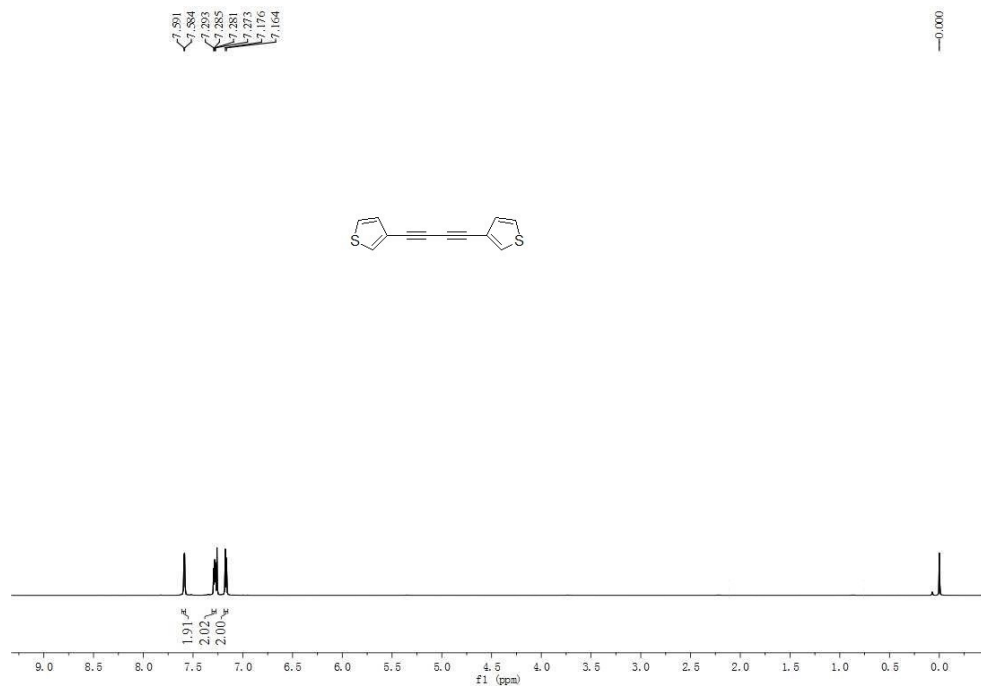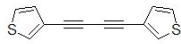

<sup>1</sup>H NMR of **2m**

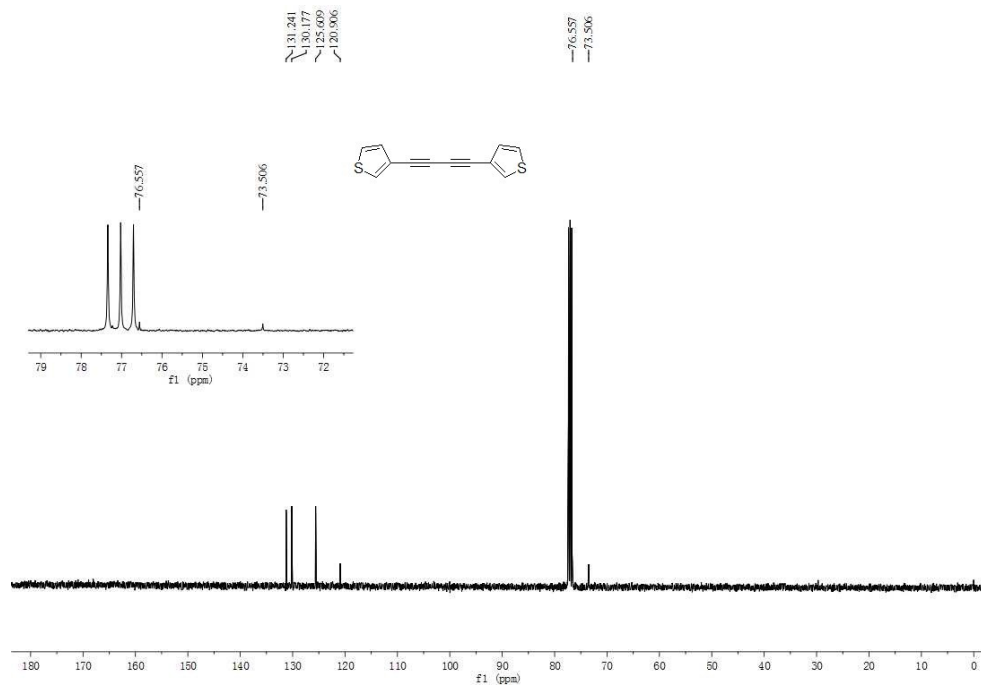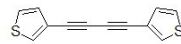

<sup>13</sup>C NMR of **2m**
